# Supplementary material for: An alternatively spliced, non-signaling insulin receptor modulates insulin sensitivity via insulin peptide sequestration in C. elegans
Source: eLife. 2020 Feb 25;9:e49917. doi: 10.7554/eLife.49917 (PMC7041946; doi:10.7554/eLife.49917)
Supplement: Figure 3—source data 2. [file elife-49917-fig3-data2.xlsx]

## Sheet: Figure 3-source data 2
	Figure 3C: daf-2b deletion suppresses dauer formation in pdk-1(sa709)
	Key:	Trial	- experiment performed on separate occasions
		Bio Rep	- biological replicate with test populations derived from independent parental populations
		Tech Rep	- technical replicate, with test populations derived from the same parental population
		n	- number of worms scored per replicate
	Data in Figure 3C
		daf-2b(Δ)
		pdk-1(sa709) control				pdk-1(sa709); daf-2b(Δ)
		Transgene	Bio Rep	% dauer	n	Transgene	Bio Rep	% dauer	n
	Trial 1	jluSi3	1	56.1538	130	jluSi3	1	27.1186	59
			2	75.5319	94		2	51.7241	87
			3	73.1183	93		3	61.3445	119
			4	76.8116	69		4	60.2564	78
			5	65.2632	95		5	55.4217	83
			6	67.0213	94		6	38.0952	84
	Trial 2	jluSi3	1	69.4656	131	jluSi3	1	48.0198	202
			2	61.1111	162		2	53.7815	119
			3	89.8649	148		3	75.1634	153
			4	60.4938	162		4	50.838	179
			5	67.1642	134		5	56.391	133
			6	88.0282	142		6	81.0976	164
	Trial 3	jluSi3	1	75.61	82	jluSi3	1	50.72	69
			2	71.58	95		2	38.2	89
			3	76.32	76		3	64	75
			4	86.92	107		4	53.85	117
			5	91.3	69		5	76.39	72
			6	93.15	73		6	71.28	94
			Mean	74.7171			Mean	56.3162
			SD	11.2626			SD	14.0865
