# Supplementary material for: An alternatively spliced, non-signaling insulin receptor modulates insulin sensitivity via insulin peptide sequestration in C. elegans
Source: eLife. 2020 Feb 25;9:e49917. doi: 10.7554/eLife.49917 (PMC7041946; doi:10.7554/eLife.49917)
Supplement: Figure 3—source data 3. [file elife-49917-fig3-data3.xlsx]

## Sheet: Figure 3-source data 3
	Figure 3D: daf-2c deletion has no effect on dauer formation in pdk-1(sa709)
	Key:	Trial	- experiment performed on separate occasions
		Bio Rep	- biological replicate with test populations derived from independent parental populations
		Tech Rep	- technical replicate, with test populations derived from the same parental population
		n	- number of worms scored per replicate
		Data in Figure 3D
			daf-2c(Δ)
			pdk-1(sa709) control				pdk-1(sa709); daf-2c(Δ)
			Transgene	Bio Rep	% dauer	n	Transgene	Bio Rep	% dauer	n
		Trial 1	jluSi1	1	60.2564	78	jluSi1	1	31.6327	98
				2	29.8246	114		2	39.3258	89
				3	37.6147	109
			jluSi2	1	32	125	jluSi2	1	62.3932	117
				2	52.8986	138		2	35.9223	103
				3	59.4937	79		3	35.1145	131
		Trial 2	jluSi1	1	28.877	187	jluSi1	1	30.7018	114
				2	45.7627	177		2	54	150
				3	56.8493	146		3	48.2353	170
			jluSi2	1	48.6911	191		4	44.6602	103
				2	60.4478	134		5	36.8421	152
				3	47.9167	144		6	66.8605	172
		Trial 3	jluSi1	1	50.59	85	jluSi1	1	40.95	105
				2	28.17	71		2	37.33	75
				3	46.61	118		3	28.57	80
			jluSi2	1	37.97	79	jluSi2	1	73.58	106
				2	24.69	81		2	57.14	70
				Mean	44.039			Mean	45.2037
				SD	12.2067			SD	13.7664
