# Supplementary material for: An alternatively spliced, non-signaling insulin receptor modulates insulin sensitivity via insulin peptide sequestration in C. elegans
Source: eLife. 2020 Feb 25;9:e49917. doi: 10.7554/eLife.49917 (PMC7041946; doi:10.7554/eLife.49917)
Supplement: Figure 4—source data 1. [file elife-49917-fig4-data1.xlsx]

## Sheet: Figure 4-source data 1
	Figure 4B-F: DAF-2B over-expression inhibits dauer recovery in daf-2(e1368)
	Key:	Trial	- experiment performed on separate occasions
		Bio Rep	- biological replicate with test populations derived from independent parental populations
		Tech Rep	- technical replicate, with test populations derived from the same parental population
		NR	- not recovered from dauer
		n	- number of worms scored per replicate
	Data in Figure 4B - F																Additional replicates
		Native DAF-2B OE		Number of animals recovered from dauer																Number of animals recovered from dauer
				Recovery time (h)																Recovery time (h)
		Strain / transgene	Tech Rep	12	24	36	48	60	72	84	96	108	120	NR	Total n			Strain / transgene	Tech Rep	12	24	36	48	60	72	84	96	108	NR	Total n
	Trial 3	daf-2(e1368)	1	8	0	1	0	4	1	2	8	0	3	5	32		Trial 1	daf-2(e1368)	1	0	0	15	13	12	2	0	0	0	0	42
			2	1	6	4	3	7	1	4	3	1	0	6	36				2	0	0	18	13	4	3	1	0	0	1	40
			3	1	4	3	3	8	3	5	4	4	2	7	44				3	0	1	13	15	6	2	0	0	0	1	38
			4	1	3	3	4	8	2	0	2	1	3	2	29				4	2	2	9	8	18	4	0	1	1	0	45
			5	0	4	3	4	2	2	4	5	0	2	6	32				Pooled	2	3	55	49	40	11	1	1	1	2	165
			6	3	6	4	5	13	1	3	3	1	3	1	43			+ daf-2p::DAF-2B OE	1	0	0	8	1	5	2	2	3	5	5	31
			Pooled	14	23	18	19	42	10	18	25	7	13	27	216			jluEx132	2	0	0	4	2	8	4	3	0	6	2	29
		+ daf-2p::DAF-2B OE	1	1	1	0	2	1	1	0	3	0	1	14	24				3	1	0	3	2	10	7	2	3	2	8	38
		jluEx132	2	1	1	3	4	3	1	4	4	3	2	13	39				4	0	0	4	1	4	1	5	1	4	4	24
			3	0	0	1	3	3	1	0	0	0	0	12	20				Pooled	1	0	19	6	27	14	12	7	17	19	122
			4	0	0	0	0	2	0	0	2	0	0	15	19			+ rab-3p::DAF-2B OE	1	0	0	0	2	1	0	1	0	0	6	10
		+ daf-2p::DAF-2B OE	1	1	1	0	0	1	0	0	0	0	0	11	14			jluEx141	2	0	0	0	1	2	1	0	1	1	27	33
		jluEx133	2	1	1	0	0	0	0	0	0	0	0	17	19				3	0	0	1	2	2	1	0	0	1	22	29
			3	0	0	1	0	0	0	0	0	0	0	18	19				4	0	0	1	2	3	1	0	0	1	18	26
			4	0	0	0	4	4	0	1	0	0	0	20	29				Pooled	0	0	2	7	8	3	1	1	3	73	98
		+ daf-2p::DAF-2B OE	1	1	0	0	1	2	2	0	1	0	2	14	23			+ myo-3p::DAF-2B OE	1	0	0	2	3	5	4	1	1	5	7	28
		jluEx134	2	1	0	0	3	7	1	3	1	2	0	20	38			jluEx139	2	0	0	2	1	2	2	1	0	4	15	27
			3	1	0	0	0	0	0	0	0	0	0	10	11				3	0	0	1	3	6	2	2	2	1	11	28
			4	1	0	0	0	10	0	0	0	0	3	9	23				4	0	0	1	2	3	6	2	1	2	12	29
			Pooled	8	4	5	17	33	6	8	11	5	8	173	278				Pooled	0	0	6	9	16	14	6	4	12	45	112
																		+ ges-1::DAF-2B OE	1	0	0	1	1	2	4	1	2	2	19	32
																		jluEx135	2	0	0	1	2	3	2	2	7	3	14	34
		Neuronal DAF-2B OE		Number of animals recovered from dauer															3	0	0	1	2	2	2	3	3	3	17	33
				Recovery time (h)															4	1	0	0	0	2	2	1	0	2	15	23
		Strain / transgene	Tech Rep	12	24	36	48	60	72	84	96	108	120	NR	Total n				Pooled	1	0	3	5	9	10	7	12	10	65	122
	Trial 4	daf-2(e1368)	1	0	0	4	5	10	2	1	2	1	3	6	34
			2	0	6	3	5	7	1	3	1	0	4	5	35					Number of animals recovered from dauer
			3	3	0	2	1	4	1	6	2	1	2	4	26					Recovery time (h)
			4	0	1	0	0	1	0	3	1	1	3	9	19			Strain / transgene	Tech Rep	24	36	48	60	72	84	96	108	NR	Total n
			5	0	3	4	0	3	2	0	5	0	4	12	33		Trial 2	daf-2(e1368)	1	0	19	7	0	0	0	0	0	0	26
			6	0	4	0	6	4	4	4	3	1	2	13	41				2	0	19	10	1	0	0	0	0	0	30
			Pooled	3	14	13	17	29	10	17	14	4	18	49	188				3	1	23	5	1	0	0	0	0	0	30
		+ rab-3p::DAF-2B OE	1	1	0	1	0	2	1	2	0	0	0	13	20				4	0	28	5	3	0	0	0	0	0	36
		jluEx141	2	0	0	0	0	0	0	0	0	0	0	18	18				Pooled	1	89	27	5	0	0	0	0	0	122
			3	0	0	0	0	0	0	0	0	0	2	17	19			+ daf-2p::DAF-2B OE	1	0	2	2	5	0	2	1	1	11	24
			4	0	0	0	0	1	0	0	0	0	0	19	20			jluEx133	2	0	2	2	3	1	3	1	0	13	25
		+ rab-3p::DAF-2B OE	1	0	0	0	0	0	0	1	0	0	0	16	17				3	0	4	3	4	0	2	2	0	18	33
		jluEx142	2	2	1	0	0	0	0	0	0	0	1	17	21				4	0	6	6	6	2	4	1	1	10	36
			3	0	0	0	0	0	1	0	0	0	0	8	9				Pooled	0	14	13	18	3	11	5	2	52	118
			4	0	0	0	0	0	0	0	0	0	1	23	24			+ rab-3p::DAF-2B OE	1	0	7	1	1	1	1	0	0	13	24
		+ rab-3p::DAF-2B OE	1	0	0	0	0	2	0	0	1	0	0	8	11			jluEx142	2	0	2	0	1	3	4	0	0	14	24
		jluEx143	2	0	0	0	0	0	0	0	0	0	1	11	12				3	0	9	2	2	2	2	0	0	14	31
			3	1	0	0	0	0	0	0	1	0	0	8	10				4	0	3	0	1	1	0	0	0	20	25
			4	1	0	0	0	2	0	0	0	0	0	9	12				Pooled	0	21	3	5	7	7	0	0	61	104
			Pooled	5	1	1	0	7	2	3	2	0	5	167	193			+ myo-3p::DAF-2B OE	1	0	6	1	4	2	6	2	1	10	32
																		jluEx140	2	0	3	2	3	3	3	1	1	10	26
																			3	0	3	4	5	3	2	1	0	6	24
		Intestinal DAF-2B OE		Number of animals recovered from dauer															4	0	7	2	2	1	4	1	2	11	30
				Recovery time (h)															Pooled	0	19	9	14	9	15	5	4	37	112
		Strain / transgene	Tech Rep	12	24	36	48	60	72	84	96	108	120	NR	Total n			+ ges-1::DAF-2B OE	1	0	4	2	6	2	3	1	0	19	37
	Trial 5	daf-2(e1368)	1	0	2	3	2	6	6	6	2	0	0	2	29			jluEx136	2	0	4	3	2	2	1	2	0	6	20
			2	0	10	9	2	4	0	5	1	0	2	3	36				3	0	5	2	2	3	5	1	3	10	31
			3	0	4	0	2	5	3	5	3	0	1	3	26				4	0	4	1	5	1	3	2	0	4	20
			4	2	7	7	4	8	2	3	1	1	2	2	39				Pooled	0	17	8	15	8	12	6	3	39	108
			5	1	11	5	2	4	0	1	0	0	3	2	29
			6	0	4	5	3	7	8	1	1	0	0	0	29
			Pooled	3	38	29	15	34	19	21	8	1	8	12	188
		+ ges-1::DAF-2B OE	1	0	0	0	0	0	0	0	2	0	1	15	18
		jluEx135	2	1	1	1	0	0	0	0	4	3	2	13	25
			3	0	0	0	0	0	0	0	0	0	3	12	15
			4												0
		+ ges-1::DAF-2B OE	1	0	0	2	0	1	0	0	3	2	0	10	18
		jluEx136	2	1	1	0	1	0	0	2	1	0	0	19	25
			3	0	0	1	0	1	1	0	3	2	0	17	25
			4	0	0	0	2	1	0	0	5	1	0	20	29
		+ ges-1::DAF-2B OE	1	1	0	0	0	0	0	0	4	0	0	7	12
		jluEx137	2	0	0	0	0	0	0	0	0	0	0	13	13
			3	1	0	0	0	0	0	0	1	0	0	17	19
			Pooled	4	2	4	3	3	1	2	23	8	6	143	199
		Muscle DAF-2B OE		Number of animals recovered from dauer
				Recovery time (h)
		Strain / transgene	Tech Rep	12	24	36	48	60	72	84	96	108	120	NR	Total n
	Trial 6	daf-2(e1368)	1	0	1	2	2	4	2	1	2	0	2	1	17
			2	0	0	10	6	4	0	4	4	0	0	3	31
			3	0	1	4	2	4	2	0	3	0	1	6	23
			4	0	2	6	7	1	0	0	1	4	1	5	27
			5	0	1	4	5	1	0	0	0	0	2	0	13
			6	0	0	1	1	1	2	2	1	0	1	11	20
			Pooled	0	5	27	23	15	6	7	11	4	7	26	131
		+ myo-3p::DAF-2B OE	1	0	0	0	0	0	0	2	0	2	0	12	16
		jluEx138	2	2	0	0	0	1	0	0	5	1	0	20	29
			3	0	1	1	0	0	1	0	2	2	0	14	21
		+ myo-3p::DAF-2B OE	1	0	0	4	3	0	4	0	0	0	2	9	22
		jluEx139	2	1	1	0	1	2	0	1	0	2	0	12	20
			3	0	1	4	3	0	1	0	4	1	0	17	31
			Pooled	3	3	9	7	3	6	3	11	8	2	84	139
		Hypodermal DAF-2B OE		Number of animals recovered from dauer
				Recovery time (h)
		Strain / transgene	Tech Rep	12	24	36	48	60	72	84	96	108	120	NR	Total n
	Trial 7	daf-2(e1368)	1	0	23	15	1	0	1	0	0	0	1	0	41
			2	9	22	13	2	2	0	0	0	0	0	0	48
			3	9	8	7	0	1	0	0	0	0	0	0	25
			4	2	19	4	1	1	0	0	0	0	1	0	28
			Pooled	20	72	39	4	4	1	0	0	0	2	0	142
		+ tag335p::DAF-2B OE	1	3	10	5	1	2	1	1	2	0	0	1	26
		jluEx144	2	2	12	14	5	2	2	0	1	0	1	1	40
		+ tag335p::DAF-2B OE	1	4	5	5	1	1	0	2	2	0	2	6	28
		jluEx145	2	1	8	3	2	1	0	0	1	0	1	5	22
			Pooled	10	35	27	9	6	3	3	6	0	4	13	116
		Hypodermal DAF-2B OE		Number of animals recovered from dauer
				Recovery time (h)
		Strain / transgene	Tech Rep	12	24	36	48	60	72	84	96	108	120	NR	Total n
	Trial 8	daf-2(e1368)	1	5	6	18	2	4	1	1	0	0	0	0	37
			2	1	7	21	5	7	1	0	0	1	0	0	43
			3	0	2	11	4	3	3	0	0	0	0	0	23
			4	0	5	10	2	3	2	2	0	0	1	0	25
			5	0	3	6	2	1	0	0	0	0	0	0	12
			Pooled	6	23	66	15	18	7	3	0	1	1	0	140
		+ tag335p::DAF-2B OE	1	0	3	7	4	4	1	1	0	2	0	2	24
		jluEx144	2	1	2	7	5	1	1	1	0	1	0	1	20
			3	1	3	8	6	4	3	3	0	2	0	5	35
		+ tag335p::DAF-2B OE	1	0	0	11	3	2	1	1	0	0	0	0	18
		jluEx145	2	1	0	9	6	3	2	1	1	0	0	0	23
			Pooled	3	8	42	24	14	8	7	1	5	0	8	120
