# Supplementary material for: An alternatively spliced, non-signaling insulin receptor modulates insulin sensitivity via insulin peptide sequestration in C. elegans
Source: eLife. 2020 Feb 25;9:e49917. doi: 10.7554/eLife.49917 (PMC7041946; doi:10.7554/eLife.49917)
Supplement: Figure 4—source data 2. [file elife-49917-fig4-data2.xlsx]

## Sheet: Figure 4-source data 2
	Figure 4G-H: daf-2b deletion enhances dauer recovery in pdk-1(sa709)
	Key:	Trial	- experiment performed on separate occasions
		Bio Rep	- biological replicate with test populations derived from independent parental populations
		Tech Rep	- technical replicate, with test populations derived from the same parental population
		NR	- not recovered from dauer
		n	- number of worms scored per replicate
	Data in Figure 4G and 4H																Additional replicates
		daf-2b(Δ) and daf-2c(Δ)		Number of animals recovered from dauer														daf-2b(Δ) and daf-2c(Δ)		Number of animals recovered from dauer
				Recovery time (h)																Recovery time (h)
		Strain (transgene)	Tech Rep	12	24	36	48	60	72	84	96	108	120	NR	Total n			Strain (transgene)	Tech Rep	12	24	36	48	60	72	84	96	108	120	NR	Total n
	Trial 1	pdk-1 control	1	7	4	7	3	2	1	0	0	0	0	9	33		Trial 2	pdk-1 control	1	2	0	4	5	0	3	5	2	1	0	19	41
		(jluSi3)	2	7	6	6	1	1	3	1	0	1	0	9	35			(jluSi3)	2	5	4	3	10	0	5	5	2	0	0	21	55
			3	4	2	7	0	4	0	1	0	0	0	12	30				3	5	2	0	2	1	2	6	1	0	0	17	36
			4	5	5	5	0	2	0	1	1	1	0	5	25				4	6	2	7	3	0	2	4	1	0	0	14	39
			5	8	3	6	3	5	0	2	1	0	1	9	38				5	4	1	2	4	0	3	3	0	0	0	17	34
			6	3	2	9	2	2	2	0	0	1	0	10	31				6	8	2	4	1	0	6	6	1	1	1	14	44
			Pooled	34	22	40	9	16	6	5	2	3	1	54	192				Pooled	30	11	20	25	1	21	29	7	2	1	102	249
		daf-2b(Δ); pdk-1	1	7	6	6	1	2	0	0	0	0	0	3	25			daf-2b(Δ); pdk-1	1	10	0	3	5	0	2	9	2	0	0	9	40
		(jluSi3)	2	6	14	15	4	7	0	1	0	0	0	0	47			(jluSi3)	2	9	2	6	9	1	4	7	2	0	0	10	50
			3	7	0	5	0	3	0	1	2	0	1	0	19				3	9	4	4	5	0	1	3	2	0	1	7	36
			4	6	4	6	1	6	0	1	0	1	0	3	28				4	9	2	1	5	0	0	11	1	0	0	8	37
			5	7	8	15	2	2	0	2	3	0	0	3	42				5	12	0	4	4	0	2	7	1	0	0	8	38
			6	13	7	8	1	2	1	3	1	0	0	2	38				6	12	4	4	7	2	1	5	0	0	0	10	45
			Pooled	46	39	55	9	22	1	8	6	1	1	11	199				Pooled	61	12	22	35	3	10	42	8	0	1	52	246
		pdk-1 control	1	7	8	8	0	2	1	1	0	1	0	10	38			pdk-1 control	1	11	1	4	2	1	1	6	2	0	0	13	41
		(jluSi1)	2	9	6	5	0	1	0	4	2	0	0	11	38			(jluSi1)	2	11	6	3	2	2	1	6	0	0	0	19	50
			3	8	10	7	2	4	0	1	2	0	1	15	50				3	8	2	4	2	0	2	0	1	2	0	12	33
		pdk-1 control	1	15	6	9	0	4	4	6	1	1	0	8	54			pdk-1 control	1	12	3	0	2	1	1	3	1	1	0	6	30
		(jluSi2)	2	12	6	4	4	3	1	2	1	0	0	5	38			(jluSi2)	2	11	1	3	3	0	4	4	0	0	0	14	40
			3	12	4	6	1	4	3	2	0	0	0	9	41				3	15	1	2	2	0	4	6	1	0	1	12	44
			Pooled	63	40	39	7	18	9	16	6	2	1	58	259				Pooled	68	14	16	13	4	13	25	5	3	1	76	238
		daf-2c(Δ); pdk-1	1	7	6	3	1	1	1	1	0	0	0	10	30			daf-2c(Δ); pdk-1	1	11	3	1	1	1	4	2	1	0	0	11	35
		(jluSi1)	2	5	2	6	1	1	0	1	0	1	0	4	21			(jluSi1)	2	16	0	2	5	1	1	1	1	1	0	17	45
			3	11	6	4	1	3	1	4	0	1	2	11	44				3	11	2	3	2	0	3	3	1	0	0	18	43
		daf-2c(Δ); pdk-1	1	10	6	6	2	3	0	2	1	0	0	10	40			daf-2c(Δ); pdk-1	1	14	3	4	2	1	4	2	0	0	0	9	39
		(jluSi2)	2	11	3	7	5	2	0	0	0	0	0	10	38			(jluSi2)	2	10	0	2	3	1	1	2	0	0	0	14	33
			3	15	3	6	5	2	1	0	0	0	0	7	39				3	14	1	6	0	2	1	4	1	0	0	14	43
			Pooled	59	26	32	15	12	3	8	1	2	2	52	212				Pooled	76	9	18	13	6	14	14	4	1	0	83	238
