# Supplementary material for: An alternatively spliced, non-signaling insulin receptor modulates insulin sensitivity via insulin peptide sequestration in C. elegans
Source: eLife. 2020 Feb 25;9:e49917. doi: 10.7554/eLife.49917 (PMC7041946; doi:10.7554/eLife.49917)
Supplement: Figure 5—source data 1. [file elife-49917-fig5-data1.xlsx]

## Sheet: Figure 5-source data 1
	Figure 5C: Overexpression of the DAF-28 agonist insulin peptide suppresses the effects of DAF-2B OE in daf-2(e1368)
	Key:	Trial	- experiment performed on separate occasions
		Bio Rep	- biological replicate with test populations derived from independent parental populations
		Tech Rep	- technical replicate, with test populations derived from the same parental population
		n	- number of worms scored per replicate
	Data in Figure 5C
	Neuronal DAF-2B OE + native DAF-28 OE
		daf-2(e1368)			daf-2(e1368); daf-28p::DAF-28				daf-2(e1368); rab-3p::DAF-2B				daf-2(e1368); daf-28p::DAF-28; rab-3p::DAF-2B
		Bio Rep	% dauer	n	Transgene	Bio Rep	% dauer	n	Transgene	Bio Rep	% dauer	n	Transgene	Bio Rep	% dauer	n
	Trial 1	1	47.9339	121	jluEx146	1	42.8571	70	jluIs17	1	81.25	160	jluIs17 + jluEx146	1	57.4468	47
		2	49.0196	102		2	43.3962	53		2	86.631	187		2	56.25	32
		3	63.1148	122	jluEx147	1	32.0988	81		3	85.9756	164	jluIs17 + jluEx147	1	39.5349	43
		4	62.0253	79		2	33.75	80		4	77.8626	131		2	56.3636	55
		5	58.3333	156	jluEx148	1	28.8462	52		5	86.9565	161	jluIs17 + jluEx148	1	50	56
		6	52.9412	119		2	30.5556	72		6	86.4286	140		2	47.8261	46
		7	57.8313	166	jluEx149	1	39.4737	76		7	90.0621	161	jluIs17 + jluEx149	1	44.4444	36
		8	52.9412	136		2	33.7838	74		8	84.7458	118		2	38.4615	26
		9	54.3307	127	jluEx150	1	28.3951	81		9	87.0504	139	jluIs17 + jluEx150	1	35.6164	73
		10	62.2047	127		2	22.5806	62		10	84.7619	105		2	38.0952	63
		11	65.873	126	jluEx151	1	36.7647	68		11	89.6552	87	jluIs17 + jluEx151	1	35.4839	62
		12	68.4685	111		2	39.1892	74		12	87.7049	122		2	36.2319	69
	Trial 2	1	45.2514	179	jluEx146	1	42.5532	94	jluIs17	1	78.9474	114	jluIs17 + jluEx146	1	50	52
		2	56.0606	132		2	37.3626	91		2	71.5328	137		2	48.3871	62
		3	44.0789	152	jluEx147	1	24.5283	106		3	80.8824	136	jluIs17 + jluEx147	1	21.7391	46
		4	46.6667	150		2	28.5714	49		4	80	115		2	38.4615	39
		5	43.2692	208	jluEx148	1	22.3881	67		5	69.2308	117	jluIs17 + jluEx148	1	34.8837	43
		6	54.8193	166		2	29.703	101		6	86.3636	110		2	54.5455	77
		7	44.4444	180	jluEx149	1	18.9189	74		7	83.3333	120	jluIs17 + jluEx149	1	37.5	24
		8	59.4595	185		2	21.7949	78		8	75	120		2	26.7442	86
		9	50.2793	179	jluEx151	1	33.3333	99		9	76.4228	123	jluIs17 + jluEx151	1	26.3158	57
		10	51.5152	165		2	52.2727	88		10	86.5772	149
		Mean	54.1301			Mean	32.869			Mean	82.6079			Mean	41.6348
		SD	7.40684			SD	8.3802			SD	5.76053			SD	10.3302
