# Supplementary material for: An alternatively spliced, non-signaling insulin receptor modulates insulin sensitivity via insulin peptide sequestration in C. elegans
Source: eLife. 2020 Feb 25;9:e49917. doi: 10.7554/eLife.49917 (PMC7041946; doi:10.7554/eLife.49917)
Supplement: Figure 5—source data 2. [file elife-49917-fig5-data2.xlsx]

## Sheet: Figure 5-source data 2
	Figure 5D: Overexpression of the INS-6 agonist insulin peptide suppresses the effects of DAF-2B OE in daf-2(e1368)
	Key:	Trial	- experiment performed on separate occasions
		Bio Rep	- biological replicate with test populations derived from independent parental populations
		Tech Rep	- technical replicate, with test populations derived from the same parental population
		NR	- not recovered from dauer
		n	- number of worms scored per replicate
	Data in Figure 5D																Additional replicates
		DAF-2B OE + INS-6 OE		Number of animals recovered from dauer														DAF-2B OE + INS-6 OE		Number of animals recovered from dauer
				Recovery time (h)																Recovery time (h)
		Strain / transgene	Tech Rep	12	24	36	48	60	72	84	96	108	120	NR	Total n			Strain / transgene	Tech Rep	12	24	36	48	60	72	84	96	108	120	NR	Total n
	Trial 3*	daf-2(e1368)	1	0	5	3	8	7	4	2	4	1	1	3	38		Trial 1	daf-2(e1368)	1	0	7	7	9	2	2	1	0	0	1	8	37
			2	0	2	3	3	8	3	10	2	2	0	11	44				2	0	3	16	2	1	2	0	0	0	0	13	37
			3	0	0	13	12	11	4	7	4	0	1	9	61				3	0	2	24	6	0	1	0	1	0	0	1	35
			4	0	3	5	6	6	6	7	12	4	2	10	61				4	0	2	2	1	6	1	4	0	1	1	20	38
			5	0	2	10	12	6	3	4	3	4	1	1	46				5	0	7	13	4	4	1	1	1	0	0	9	40
			6	0	0	12	20	5	2	3	6	6	0	5	59				6	0	1	7	3	3	0	2	1	0	1	14	32
			Pooled	0	12	46	61	43	22	33	31	17	5	39	309				Pooled	0	22	69	25	16	7	8	3	1	3	65	219
		+ jluIs17	1	0	0	0	0	0	0	0	0	0	0	24	24			+ jluIs17	1	0	0	0	0	0	0	0	0	0	0	22	22
			2	0	0	0	0	0	0	0	0	0	0	29	29				2	0	0	0	0	0	0	0	0	0	0	20	20
			3	0	0	0	0	0	0	0	0	0	0	18	18				3	0	0	0	0	0	0	0	0	0	0	15	15
			4	0	0	0	0	0	0	0	0	0	0	16	16				4	0	0	0	0	0	0	0	0	0	0	27	27
			5	0	0	0	0	0	0	0	0	0	0	24	24				5	0	0	0	0	0	0	0	0	0	0	31	31
			Pooled	0	0	0	0	0	0	0	0	0	0	111	111				6	0	0	0	0	0	0	0	0	0	0	24	24
		+ jluEx152	1	3	12	2	1	1	0	0	0	0	0	0	19				Pooled	0	0	0	0	0	0	0	0	0	0	139	139
		+ jluEx153	1	11	20	4	1	0	0	0	0	0	0	0	36			+ jluEx152	1	17	15	10	3	1	0	0	0	0	0	2	48
		+ jluEx154	1	5	13	8	4	0	0	0	0	0	0	0	30			+ jluEx153	1	18	17	9	2	1	1	0	0	0	0	1	49
		+ jluEx155	1	12	16	14	4	0	0	0	0	0	0	0	46			+ jluEx154	1	13	10	16	2	2	0	0	0	0	0	1	44
		+ jluEx156	1	7	22	9	1	0	0	0	0	0	0	0	39			+ jluEx155	1	24	10	5	2	3	0	1	0	0	0	1	46
		+ jluEx157	1	4	35	4	1	0	0	0	0	0	0	0	44			+ jluEx156	1	13	19	5	0	2	1	1	2	0	0	2	45
			Pooled	42	118	41	12	1	0	0	0	0	0	0	214			+ jluEx157	1	24	17	4	0	1	0	1	0	0	0	0	47
		+ jluIs17 + jluEx155	1	0	3	3	4	2	0	0	0	0	0	24	36				Pooled	109	88	49	9	10	2	3	2	0	0	7	279
		+ jluIs17 + jluEx156	1	0	1	4	6	0	1	0	0	0	0	11	23			+ jluIs17 + jluEx152	1	0	0	2	1	2	0	0	2	0	0	6	13
		+ jluIs17 + jluEx157	1	0	1	6	6	2	0	1	1	1	0	14	32			+ jluIs17 + jluEx153	1	0	1	0	3	2	1	0	0	0	0	31	38
			Pooled	0	5	13	16	4	1	1	1	1	0	49	91			+ jluIs17 + jluEx155	1	0	0	3	2	1	1	2	0	0	0	9	18
																		+ jluIs17 + jluEx156	1	0	2	2	0	0	0	0	1	0	0	2	7
																			Pooled	0	3	7	6	5	2	2	3	0	0	48	76
																		DAF-2B OE + INS-6 OE		Number of animals recovered from dauer
																				Recovery time (h)
																		Strain / transgene	Tech Rep	12	24	36	48	60	72	84	96	108	120	NR	Total n
																	Trial 2	daf-2(e1368)	1	1	5	4	4	4	0	2	0	0	2	14	36
																			2	0	1	13	3	4	1	0	0	0	0	18	40
																			3	0	6	26	4	0	0	0	0	0	1	2	39
																			4	1	3	5	6	0	0	0	1	1	1	14	32
																			5	1	2	11	4	2	0	1	1	0	0	11	33
																			6	0	6	5	0	4	7	6	7	0	0	2	37
																			Pooled	3	23	64	21	14	8	9	9	1	4	61	217
																		+ jluIs17	1	0	0	0	0	0	0	0	0	0	0	32	32
																			2	0	0	0	0	0	0	0	0	0	0	27	27
																			3	0	0	0	0	0	0	0	0	0	0	25	25
																			4	0	0	0	0	0	0	0	0	0	0	34	34
																			5	0	0	0	0	0	0	0	0	0	0	25	25
																			6	0	0	0	0	0	0	0	0	0	0	30	30
																			Pooled	0	0	0	0	0	0	0	0	0	0	173	173
																		+ jluEx152	1	19	6	4	0	2	3	1	0	0	1	0	36
																		+ jluEx153	1	20	9	4	1	1	3	0	0	0	1	3	42
																		+ jluEx155	1	34	3	3	0	1	7	1	1	0	1	2	53
																		+ jluEx156	1	15	8	4	0	0	3	0	0	0	1	1	32
																			Pooled	88	26	15	1	4	16	2	1	0	4	6	163
																		+ jluIs17 + jluEx152	1	0	3	13	0	4	2	3	1	0	0	17	43
																		+ jluIs17 + jluEx153	1	3	1	1	2	5	0	2	2	1	1	15	33
																		+ jluIs17 + jluEx155	1	0	2	3	0	3	2	1	0	0	0	13	24
																		+ jluIs17 + jluEx156	1	1	0	6	2	7	3	5	1	0	1	16	42
																			Pooled	4	6	23	4	19	7	11	4	1	2	61	142
