# Supplementary material for: An alternatively spliced, non-signaling insulin receptor modulates insulin sensitivity via insulin peptide sequestration in C. elegans
Source: eLife. 2020 Feb 25;9:e49917. doi: 10.7554/eLife.49917 (PMC7041946; doi:10.7554/eLife.49917)
Supplement: Figure 5—source data 3. [file elife-49917-fig5-data3.xlsx]

## Sheet: Figure 5-source data 3
	Figure 5F: Overexpression of mutant DAF-2B in daf-2(e1368)
	Key:	Trial	- experiment performed on separate occasions
		Bio Rep	- biological replicate with test populations derived from independent parental populations
		Tech Rep	- technical replicate, with test populations derived from the same parental population
		n	- number of worms scored per replicate
	Data in Figure 5F
	Mutant DAF-2B OE
		daf-2(e1368)			daf-2(e1368); rab-3p::DAF-2B::FLAG				daf-2(e1368); rab-3p::DAF-2B(C196Y)::FLAG
		Bio Rep	% dauer	n	Transgene	Bio Rep	% dauer	n	Transgene	Bio Rep	% dauer	n
	Trial 1	1	34.9315	146	jluEx158	1	54.1667	24	jluEx164	1	52.5424	59
		2	24.3902	164	jluEx159	1	81.25	32		2	50	50
		3	32.3741	139	jluEx160	1	55.5556	54	jluEx165	1	50.9434	53
		4	37.2671	161		2	73.913	46		2	69.4915	59
		5	30.8725	149	jluEx161	1	73.2143	56	jluEx166	1	55.5556	27
		6	35.1852	162		2	77.2727	44	jluEx168	1	37.5	40
		7	41.1765	119	jluEx163	1	64.4444	45	jluEx169	1	57.5	40
		8	30.3448	145
		9	32.6087	138
		10	30.137	146
		11	32.3171	164
		12	29.0598	117
	Trial 2	1	30.7018	114	jluEx158	1	55.8824	34	jluEx164	1	50	82
		2	38.3178	107		2	43.5897	39		2	64.5161	31
		3	42.5743	101	jluEx159	1	62.5	32		3	52.6316	38
		4	55.3719	121	jluEx160	1	63.2653	49		4	51.5152	33
		5	36.4407	118		2	67.7966	59	jluEx165	1	40.5405	37
		6	36.9565	138	jluEx161	1	61.1111	36		2	51.2821	39
		7	33.0882	136		2	64	50	jluEx166	1	56.4103	39
		8	25.1852	135	jluEx162	1	54.386	57	jluEx167	1	43.2432	37
		9	40.3846	104		2	50.9091	55		2	27.3973	73
		10	38.9381	113	jluEx163	1	66.6667	66	jluEx169	1	53.3333	45
		11	43.9024	41		2	70.8333	48
		12	38.7597	129
		Mean	35.4702			Mean	63.3754			Mean	50.8472
		SD	6.63878			SD	9.83304			SD	9.8051
