# Supplementary material for: An alternatively spliced, non-signaling insulin receptor modulates insulin sensitivity via insulin peptide sequestration in C. elegans
Source: eLife. 2020 Feb 25;9:e49917. doi: 10.7554/eLife.49917 (PMC7041946; doi:10.7554/eLife.49917)
Supplement: Figure 7—source data 1. [file elife-49917-fig7-data1.xlsx]

## Sheet: Figure 7-source data 1
	Figure 7C: DAF-2B over-expression suppresses pheromone-induced dauer formation in wild type
	Key:	Trial	- experiment performed on separate occasions
		Bio Rep	- biological replicate with test populations derived from independent parental populations
		Tech Rep	- technical replicate, with test populations derived from the same parental population
		n	- number of worms scored per replicate
	Data in Figure 7C
		Control			Native DAF-2B OE						Control			Neuronal DAF-2B OE						Control			Hypodermal DAF-2B OE						Control			Muscle DAF-2B OE						Control			Intestinal DAF-2B OE
		N2			daf-2p::DAF-2B						N2			rab-3p::DAF-2B						N2			tag-335p::DAF-2B						N2			myo-3p::DAF-2B						N2			ges-1p::DAF-2B
		Bio Rep	% dauer	n	Transgene	Bio Rep	% dauer	n			Bio Rep	% dauer	n	Transgene	Bio Rep	% dauer	n			Bio Rep	% dauer	n	Transgene	Bio Rep	% dauer	n			Bio Rep	% dauer	n	Transgene	Bio Rep	% dauer	n			Bio Rep	% dauer	n	Transgene	Bio Rep	% dauer	n
	Trial 3	1	57.931	145	jluEx132	1	42.9825	114		Trial 4	1	77.2727	154	jluEx141	1	19.7368	76		Trial 5	1	53.9683	189	jluEx144	1	31.25	96		Trial 6	1	49.5614	228	jluEx138	1	53.0303	66		Trial 7	1	64.6409	181	jluEx135	1	61.6438	73
		2	52.0833	192		2	59.7826	92			2	61.4525	179		2	13.3333	75			2	41.8079	177		2	48.4848	99			2	53.8889	180		2	40	75			2	69.7561	205		2	53.0864	81
		3	68.4211	209		3	52.6316	95			3	40.678	177		3	26.0274	73			3	71.8919	185		3	28.2051	78			3	58.5153	229		3	42.6471	68			3	76.087	184		3	68.2353	85
		4	62.5641	195		4	52.6316	76			4	63.0769	195		4	42.0168	119			4	59.3939	165		4	27.7778	90			4	23.0366	191		4	39.0625	64			4	63.0769	195		4	63.5294	85
		5	61.6352	159		5	56.9767	86			5	59.1837	147		5	18.0851	94			5	53.012	166		5	36.1446	83			5	74.4186	215		5	56.25	80			5	77.8443	167	jluEx136	1	63.75	80
		6	61.236	178	jluEx133	1	41.6667	72			6	56.0606	198	jluEx142	1	29.4737	95			6	79.4702	151	jluEx145	1	51.2195	41			6	56.3291	158	jluEx139	1	44.8718	78			6	74.4318	176		2	64.3678	87
		7	58.8608	158		2	35.0877	57			7	46.0465	215		2	14.9254	67			7	71.0983	173		2	50	66			7	50	184		2	61.039	77			7	73.5	200		3	71.4286	105
		8	63.6872	179		3	46.5753	73			8	35.6757	185		3	26.5625	64			8	61.6114	211		3	63.2653	49			8	61.5385	182		3	63.9175	97			8	55.5556	216		4	71.9008	121
		9	59.1716	169		4	39.1304	69			9	59.9174	242		4	25.8621	58			9	57.8947	171		4	33.8983	59			9	36	175		4	57.1429	77				47.907	215		5	65.5172	87
		10	59.3548	155		5	69.8413	63						jluEx143	1	32.0513	78			10	56.3218	174		5	55.5556	72							5	37.8049	82				82.0652	184	jluEx137	1	61.1765	85
					jluEx134	1	23.5294	68							2	20.7317	82															jluEx140	1	44.4444	45							2	63.3663	101
						2	27.2727	66							3	18.0556	72																2	51.6129	62							3	64.1975	81
						3	40	85							4	37.5	72																									4	56.8421	95
						4	43.2836	67							5	27.907	43																									5	63.6364	77
		Mean	60.4945			Mean	45.0994				Mean	55.4849			Mean	25.162				Mean	60.647			Mean	42.5801				Mean	51.4765			Mean	49.3186				Mean	68.4865			Mean	63.7627
		SD	4.24519			SD	12.5544				SD	12.7591			SD	8.35486				SD	10.9371			SD	12.6126				SD	14.8353			SD	9.00217				SD	10.6801			SD	4.97622
	Additional replicates
		Control			Native DAF-2B OE				Neuronal DAF-2B OE				Muscle DAF-2B OE				Intestinal DAF-2B OE							Control			Native DAF-2B OE
		N2			daf-2p::DAF-2B				rab-3p::DAF-2B				myo-3p::DAF-2B				ges-1p::DAF-2B							N2			daf-2p::DAF-2B
		Bio Rep	% dauer	n	Transgene	Bio Rep	% dauer	n	Transgene	Bio Rep	% dauer	n	Transgene	Bio Rep	% dauer	n	Transgene	Bio Rep	% dauer	n				Bio Rep	% dauer	n	Transgene	Bio Rep	% dauer	n
	Trial 1	1	42.268	194	jluEx132	1	33.6842	95	jluEx141	1	21.9178	73	jluEx139	1	25.8621	58	jluEx135	1	61.2613	111			Trial 2	1	65.6109	221	jluEx141	1	54.6667	75
		2	66.5158	221		2	44.9153	118		2	28.8889	90		2	35.7143	98		2	47.6744	86				2	65.7754	187		2	56.25	80
		3	66.4384	146		3	58.5106	94		3	20	105		3	36.8852	122		3	65.2632	95				3	60	185		3	64.7059	119
		4	55.0505	198		4	52.3256	86		4	29.2683	123		4	46.6667	105		4	58.5586	111				4	66.2983	181		4	60.6061	99
		5	37.2093	86	jluEx133	1	42.4242	66	jluEx142	1	12.963	54					jluEx136	1	61.8557	97				5	60.4651	215		5	41.7323	127
		6	28.125	96		2	38.4615	65		2	11.3636	44						2	50.7042	71				6	62.5	192	jluEx142	1	30.9524	84
		7	62.6761	142		3	28.5714	77		3	14.2857	42						3	52.0833	48				7	49.345	229		2	35.1351	74
		8	45.6311	103		4	44.7761	67		4	10.8696	46						4	46.0317	63				8	54.7872	188		3	35.2941	85
		Mean	50.4893			Mean	42.9586			Mean	18.6946			Mean	36.2821			Mean	55.429					9	45.6221	217		4	50	66
		SD	14.3838			SD	9.63811			SD	7.51269			SD	8.50691			SD	7.20893					10	55.2326	172		5	53.125	64
																											jluEx143	1	56.25	96
																												2	50	90
																												3	61.157	121
																								Mean	58.5637			Mean	49.9904
																								SD	7.15306			SD	10.9213
