# Supplementary material for: An alternatively spliced, non-signaling insulin receptor modulates insulin sensitivity via insulin peptide sequestration in C. elegans
Source: eLife. 2020 Feb 25;9:e49917. doi: 10.7554/eLife.49917 (PMC7041946; doi:10.7554/eLife.49917)
Supplement: Figure 7—source data 2. [file elife-49917-fig7-data2.xlsx]

## Sheet: Figure 7-source data 2
	Figure 7D: daf-2b deletion enhances pheromone-induced dauer formation in wild type
	Key:	Trial	- experiment performed on separate occasions
		Bio Rep	- biological replicate with test populations derived from independent parental populations
		Tech Rep	- technical replicate, with test populations derived from the same parental population
		n	- number of worms scored per replicate
	Data in Figure 7D
		daf-2b(Δ)
		N2 control				daf-2b(Δ)
		Transgene	Bio Rep	% dauer	n	Transgene	Bio Rep	% dauer	n
	Trial 1	jluSi3	1	26.4706	170	jluSi3	1	48.9691	194
			2	34.2541	181		2	58.6022	186
			3	39.4118	170		3	58.1395	215
			4	43.0939	181		4	51.9417	206
			5	29.5337	193		5	64.6226	212
		jluSi4	1	24.6914	162	jluSi4	1	55.0633	158
			2	23.4177	158		2	48.2143	168
			3	21.4286	126		3	45.8101	179
			4	14.8936	141		4	54.2453	212
			5	14.5299	117		5	48.6487	148
	Trial 2	jluSi3	1	41.7219	151	jluSi3	1	53.5714	140
			2	30.8219	146		2	56.5517	145
			3	30.6306	111		3	60.5839	137
			4	29.1339	127		4	55.9322	177
			5	19.5402	87
		jluSi4	1	20.4546	132	jluSi4	1	53.3333	165
			2	19.1919	99		2	56.25	144
			3	27.7778	108		3	46.0938	128
							4	69.1176	136
							5	42.7273	110
			Mean	27.2777			Mean	54.1273
			SD	8.51092			SD	6.61724
