# Supplementary material for: An alternatively spliced, non-signaling insulin receptor modulates insulin sensitivity via insulin peptide sequestration in C. elegans
Source: eLife. 2020 Feb 25;9:e49917. doi: 10.7554/eLife.49917 (PMC7041946; doi:10.7554/eLife.49917)
Supplement: Figure 7—source data 3. [file elife-49917-fig7-data3.xlsx]

## Sheet: Figure 7-source data 3
	Figure 7E: daf-2c deletion has no effect on pheromone-induced dauer formation in wild type
	Key:	Trial	- experiment performed on separate occasions
		Bio Rep	- biological replicate with test populations derived from independent parental populations
		Tech Rep	- technical replicate, with test populations derived from the same parental population
		n	- number of worms scored per replicate
	Data in Figure 7E
		daf-2c(Δ)
		N2 control				daf-2c(Δ)
		Transgene	Bio Rep	% dauer	n	Transgene	Bio Rep	% dauer	n
	Trial 1	jluSi1	1	55.0459	109	jluSi1	1	54.054	185
			2	53.8043	184		2	37.766	188
			3	54.321	162		3	47.8261	184
			4	51.8919	185		4	26.8293	205
			5	47.0588	170		5	42.9293	198
		jluSi2	1	39.4118	170	jluSi2	1	24.7368	190
			2	41.0112	178		2	28.3237	173
			3	50.9554	157		3	41.8719	203
			4	41.1765	136		4	47.5676	185
							5	52.1739	207
	Trial 2	jluSi1	1	43.662	142	jluSi1	1	23.0263	152
			2	45.0331	151		2	42.7586	145
			3	39.6947	131		3	40.9722	144
			4	45.8333	144		4	34.7826	115
			5	62.1622	111		5	41.1765	170
		jluSi2	1	18.8976	127	jluSi2	1	43.0556	144
			2	34.965	143		2	37.037	108
			3	31.0078	129		3	32.1918	146
			4	31.7241	145		4	32.2835	127
			5	17.3913	115		5	29.3651	126
			Mean	42.3709			Mean	38.0364
			SD	11.8426			SD	8.95592
