# Supplementary material for: An alternatively spliced, non-signaling insulin receptor modulates insulin sensitivity via insulin peptide sequestration in C. elegans
Source: eLife. 2020 Feb 25;9:e49917. doi: 10.7554/eLife.49917 (PMC7041946; doi:10.7554/eLife.49917)
Supplement: Figure 7—source data 4. [file elife-49917-fig7-data4.xlsx]

## Sheet: Figure 7-spurce data 4
	Figure 7F: DAF-2B OE suppresses the effect of INS-18 OE in pheromone induced dauer formation in wild type
	Key:	Trial	- experiment performed on separate occasions
		Bio Rep	- biological replicate with test populations derived from independent parental populations
		Tech Rep	- technical replicate, with test populations derived from the same parental population
		n	- number of worms scored per replicate
	Data in Figure 7F
	Neuronal DAF-2B OE + native INS-18 OE
		N2			ins-18p::INS-18				rab-3p::DAF-2B				ins-18p::INS-18; rab-3p::DAF-2B
		Bio Rep	% dauer	n	Transgene	Bio Rep	% dauer	n	Transgene	Bio Rep	% dauer	n	Transgene	Bio Rep	% dauer	n
	Trial 1	1	30.0885	113	jluEx170	1	42.8571	70	jluIs17	1	1.25	80	jluIs17 + jluEx170	1	5.26316	38
		2	16.0584	137		2	43.3962	53		2	1.17647	85		2	3.38983	59
		3	18.0328	122		3				3	1.92308	52		3	0	28
		4	19.0909	110	jluEx171	1	32.0988	81		4	0	74	jluIs17 + jluEx171	1	3.0303	33
		5	17.4242	132		2	33.75	80		5	0	50		2	2.22222	45
		6	19.3548	124		3				6	0	79		3	4.87805	41
		7	36.4964	137	jluEx172	1	28.8462	52		7	0	94	jluIs17 + jluEx172	1	2.12766	47
		8	16.0714	112		2				8	1.17647	85		2	3.57143	56
		9	31.8182	176		3	30.5556	72		9	0	74		3	6.45161	31
		10	12.8378	148	jluEx173	1	39.4737	76		10	0	59	jluIs17 + jluEx173	1	4.7619	42
		11	23.0088	113		2	33.7838	74		11	1.33333	75		2	2.85714	70
		12	19.2308	104	jluEx174	1	28.3951	81		12	0	82	jluIs17 + jluEx174	1	0	81
						2								2	7.69231	26
						3	22.5806	62						3	4	50
					jluEx175	1	36.7647	68						4	0	28
						2							jluIs15 + jluEx175	1	3.94737	76
						3	39.1892	74						2	5.66038	53
														3	0	54
	Trial 2	1	15.7576	165	jluEx170	1	42.8571	70	jluIs17	1	3.50877	57	jluIs17 + jluEx170	1	4.34783	46
		2	24.6835	158		2	43.3962	53		2	1.33333	75		2	2.32558	43
		3	45.3237	139		3				3	1.07527	93		3	0	59
		4	31.9728	147	jluEx171	1	32.0988	81		4	0	82	jluIs17 + jluEx171	1	4	50
		5	24.1176	170		2	33.75	80		5	3.6036	111		2	4.30108	93
		6	26.087	138		3				6	5.21739	115		3	7.31707	41
		7	15.4472	123	jluEx172	1	28.8462	52		7	2.40964	83	jluIs17 + jluEx172	1	6.77966	59
		8	29.375	160		2				8	5.71429	105		2	7.69231	65
		9	33.1126	151		3	30.5556	72		9	0.862069	116		3	3.22581	62
		10	36.5385	156	jluEx173	1	39.4737	76		10	0	79	jluIs17 + jluEx173	1	5.34351	131
		11	18.75	160		2	33.7838	74		11	0	77		2	1.88679	53
		12	25.8824	170	jluEx174	1	28.3951	81					jluIs17 + jluEx174	1	6.45161	62
						2							jluIs15 + jluEx175	1	5.76923	156
					jluEx175	1	36.7647	68						2	4.22535	142
						2								3	1.2987	77
						3	39.1892	74
		Mean	24.44			Mean	34.8174			Mean	1.32973			Mean	3.78236
		SD	8.3742			SD	5.73944			SD	1.70286			SD	2.31835
